# Supplementary material for: Magnetic Resonance Imaging Findings in Infants with Severe Traumatic Brain Injury and Associations with Abusive Head Trauma
Source: MDPI journal article supplement (doi:10.3390/children9071092), 2022-07-21
Supplement: s1 [file s1]

Supplementary files:

**Table S1.** Lesion Prevalence and Quantification by Injury Type and Brain Region.

| Injury                | Region                 | N (%)     | Median [IQR]    |
|-----------------------|------------------------|-----------|-----------------|
| Diffuse Axonal Injury |                        | total=36  | # of lesions    |
|                       | Corpus Callosum        | 24 (29.6) | 5 [1,12]        |
|                       | Brainstem              | 11 (13.6) | 2 [1.5,3.5]     |
|                       | Cerebellum             | 9 (11.1)  | 5 [4,22]        |
|                       | Frontal Lobes          | 26 (32.1) | 7.5 [2,11]      |
|                       | Parietal Lobes         | 20 (24.7) | 5.5 [2.8,11]    |
|                       | Temporal Lobes         | 17 (21)   | 5 [2,11]        |
|                       | Occipital Lobes        | 10 (12.3) | 10 [4.5,11]     |
|                       | Thalamus/Basal Ganglia | 9 (11.1)  | 2 [1,10]        |
| Contusion             |                        | total=46  | Lesion volume   |
|                       | Brainstem              | 0 (0)     | 0               |
|                       | Cerebellum             | 5 (6.2)   | 0.7 [0.3,1.6]   |
|                       | Frontal Lobes          | 29 (35.8) | 7.1 [4.3,21.3]  |
|                       | Parietal Lobes         | 19 (23.5) | 27.1 [6.6,56.6] |
|                       | Temporal Lobes         | 27 (33.3) | 4.3 [2,8.6]     |
|                       | Occipital Lobes        | 10 (12.3) | 13.3 [6.4,26.6] |
|                       | Thalamus/Basal Ganglia | 0 (0)     | 0               |
| Ischemia              |                        | total=57  | # of regions    |
|                       | Brainstem              | 4 (4.9)   | NA              |
|                       | Cerebellum             | 22 (27.2) | 2 [2,2]         |
|                       | Frontal Lobes          | 51 (63)   | 2 [1,2]         |
|                       | Parietal Lobes         | 50 (61.7) | 2 [1,2]         |
|                       | Temporal Lobes         | 46 (56.8) | 2 [1,2]         |
|                       | Occipital Lobes        | 43 (53.1) | 2 [1,2]         |
|                       | Thalamus/Basal Ganglia | 40 (49.4) | 2 [1,2]         |

**Table S2.** Linear Density Ratio univariate model of midline shift and intraventricular hemorrhage with injury characteristics.

|                      |                   | Estimate | Std. Error | t value | Pr(> t ) | F stat | df1 | df2 | P-value |
|----------------------|-------------------|----------|------------|---------|----------|--------|-----|-----|---------|
| <b>Midline Shift</b> |                   |          |            |         |          |        |     |     |         |
| Age                  |                   | -0.25386 | 0.41466    | -0.61   | 0.54     | 0.384  | 1   | 79  | 0.54    |
| Sex                  | Male              | -1.038   | 0.494      | -2.1    | 0.039    | 4.38   | 1   | 79  | 0.04    |
| GCS                  |                   | 0.321    | 0.154      | 2.09    | 0.04     | 4.19   | 1   | 79  | 0.044   |
| Abuse                | Yes               | 0.0415   | 0.4916     | 0.08    | 0.93     | 0.0071 | 1   | 79  | 0.93    |
| Cause                | MVA               |          |            |         |          | 1.1    | 3   | 77  | 0.36    |
|                      | Fall              | -1.198   | 0.783      | -1.53   | 0.130    |        |     |     |         |
|                      | Inflicted         | -0.774   | 0.539      | -1.43   | 0.155    |        |     |     |         |
|                      | Other Accidental  | -1.421   | 1.237      | -1.15   | 0.254    |        |     |     |         |
| Type                 | Closed            |          |            |         |          | 2.94   | 1   | 79  | 0.09    |
|                      | Penetrating/crush | -21.064  | 15854.060  | 0.00    | 1.00     |        |     |     |         |
| Mechanism            | Accel/Decel       |          |            |         |          | 0.862  | 5   | 75  | 0.51    |
|                      | Impact            | -0.566   | 0.526      | -1.08   | 0.29     |        |     |     |         |
|                      | Crush             | -21.495  | 25067.478  | 0.00    | 1.00     |        |     |     |         |
|                      | Fall              | -1.083   | 0.877      | -1.23   | 0.22     |        |     |     |         |

|                                    |                       | Estimate         | Std. Error | t value | Pr(> t ) | F stat | df1 | df2 | P-value |
|------------------------------------|-----------------------|------------------|------------|---------|----------|--------|-----|-----|---------|
|                                    | Gunshot               | -21.495          | 25067.478  | 0.00    | 1.00     |        |     |     |         |
|                                    | Unknown               | -0.138           | 1.370      | -0.10   | 0.92     |        |     |     |         |
| <b>Intraventricular Hemorrhage</b> |                       |                  |            |         |          |        |     |     |         |
|                                    | Age                   | -0.253           | 0.311      | -0.81   | 0.419    | 0.669  | 1   | 79  | 0.42    |
|                                    | Sex Male              | -0.307           | 0.364      | -0.84   | 0.40     | 0.708  | 1   | 79  | 0.4     |
|                                    | GCS                   | 0.0188           | 0.1104     | 0.17    | 0.865    | 0.0294 | 1   | 79  | 0.86    |
|                                    | Abuse Yes             | -0.8681          | 0.3799     | -2.28   | 0.025    | 5.43   | 1   | 79  | 0.022   |
|                                    | Cause MVA             | <i>Reference</i> |            |         |          | 5.95   | 3   | 77  | 0.001*  |
|                                    | Fall                  | -1.555           | 0.534      | -2.91   | 0.0047   |        |     |     |         |
|                                    | Inflicted             | -1.539           | 0.355      | -4.33   | 4.4e-05  |        |     |     |         |
|                                    | Other Accidental      | -1.421           | 0.784      | -1.81   | 0.0734   |        |     |     |         |
|                                    | Type Closed           | <i>Reference</i> |            |         |          | 0.249  | 1   | 79  | 0.62    |
|                                    | Penetrating/crush     | 0.342            | 0.645      | 0.53    | 0.598    |        |     |     |         |
|                                    | Mechanism Accel/Decel | <i>Reference</i> |            |         |          | 0.772  | 5   | 75  | 0.57    |
|                                    | Impact                | -4.05e-01        | 4.10e-01   | -0.99   | 0.33     |        |     |     |         |
|                                    | Crush                 | -3.96e-17        | 1.02e+00   | 0.00    | 1.00     |        |     |     |         |
|                                    | Fall                  | -6.93e-01        | 6.50e-01   | -1.07   | 0.29     |        |     |     |         |
|                                    | Gunshot               | 4.05e-01         | 8.07e-01   | 0.50    | 0.62     |        |     |     |         |
|                                    | Unknown               | -2.03e+01        | 1.82e+04   | 0.00    | 1.00     |        |     |     |         |

Motor vehicle accident (MVA); Glasgow Coma Scale (GCS); \* Hochberg adjusted p-value  $\leq 0.05$ .

**Table S3.** Linear Density Ratio univariate model of lesion and abuse, excluding subjects with “Possible Abuse”.

|                       |           | Estimate | Std. Error | t value | Pr(> t ) | F stat | df1 | df2 | P-value |
|-----------------------|-----------|----------|------------|---------|----------|--------|-----|-----|---------|
| Diffuse Axonal Injury | Abuse Yes | -0.821   | 0.421      | -1.95   | 0.056    | 3.54   | 1   | 61  | 0.065   |
| Contusion             | Abuse Yes | 0.0907   | 0.4903     | 0.19    | 0.85     | 0.034  | 1   | 61  | 0.85    |
| Ischemia              | Abuse Yes | 1.481    | 0.415      | 3.57    | 0.00071  | 19.5   | 1   | 61  | 4.2e-05 |
